# Supplementary material for: Rapid online fractionated analyses of rare earth elements in a dinosaur fossil by mass spectrometry
Source: Royal Society of Chemistry journal article supplement (doi:10.1039/d1ja00265a), 2021-01-01
Supplement: d1ja00265a1.pdf [file d1ja00265a1.pdf]

# Supporting Information

## **Rapid online fractionated analysis of rare earth elements in a dinosaur fossil by mass spectrometry**

Faliang Li<sup>a</sup>, Hui Li<sup>a</sup>, Zequn Yang<sup>a</sup>, Timothy D. Huang<sup>b</sup>, Debo Wu<sup>a</sup>, Shuanglong Wang<sup>a\*</sup>

<sup>a</sup> Jiangxi Key Laboratory for Mass Spectrometry and Instrumentation, East China University of Technology, Nanchang 330013, P. R. China

<sup>b</sup> PaleoChemistry and PaleoEvolution of Ancient Life of International Center of Future Science of Jilin University, ChangChun, Jilin, P.R. China

### **Corresponding author:**

Dr. Shuanglong Wang

E-mail: [jjayou1010@163.com](mailto:jjayou1010@163.com)

418 Guanglan Road, Nanchang 330013 P.R. China

East China University of Technology

Tel: (+86)791-8389-6370.

Fax: (+86)791-8389-6370.

Table S1 Distribution of total REEs in different samples

|                       | $m_s/mg$ | La <sub>2</sub> O <sub>3</sub> | CeO <sub>2</sub> | Pr <sub>6</sub> O <sub>11</sub> | Nd <sub>2</sub> O <sub>3</sub> | Sm <sub>2</sub> O <sub>3</sub> | Eu <sub>2</sub> O <sub>3</sub> | Gd <sub>2</sub> O <sub>3</sub> | Tb <sub>4</sub> O <sub>7</sub> | Dy <sub>2</sub> O <sub>3</sub> | Ho <sub>2</sub> O <sub>3</sub> | Er <sub>2</sub> O <sub>3</sub> | Tm <sub>2</sub> O <sub>3</sub> | Yb <sub>2</sub> O <sub>3</sub> | Lu <sub>2</sub> O <sub>3</sub> | Y <sub>2</sub> O <sub>3</sub> |
|-----------------------|----------|--------------------------------|------------------|---------------------------------|--------------------------------|--------------------------------|--------------------------------|--------------------------------|--------------------------------|--------------------------------|--------------------------------|--------------------------------|--------------------------------|--------------------------------|--------------------------------|-------------------------------|
| #1                    | 2.01     | 4.71                           | 16.83            | 2.22                            | 12.54                          | 4.72                           | 1.38                           | 8.39                           | 1.21                           | 6.04                           | 0.97                           | 2.06                           | 0.19                           | 0.86                           | 0.10                           | 37.77                         |
| #2                    | 1.82     | 4.71                           | 17.03            | 2.27                            | 12.48                          | 5.06                           | 1.47                           | 8.61                           | 1.24                           | 6.11                           | 0.98                           | 2.06                           | 0.20                           | 0.87                           | 0.10                           | 36.80                         |
| #3                    | 2.09     | 4.62                           | 16.93            | 2.26                            | 12.38                          | 4.96                           | 1.44                           | 8.37                           | 1.20                           | 5.96                           | 0.95                           | 1.99                           | 0.19                           | 0.84                           | 0.10                           | 37.81                         |
| #4                    | 2.08     | 4.52                           | 12.31            | 1.49                            | 7.88                           | 3.37                           | 1.12                           | 7.52                           | 1.23                           | 6.89                           | 1.23                           | 2.79                           | 0.28                           | 1.23                           | 0.15                           | 47.99                         |
| #5                    | 1.78     | 7.16                           | 14.39            | 2.19                            | 9.53                           | 2.88                           | 0.81                           | 6.18                           | 1.19                           | 6.01                           | 1.16                           | 2.69                           | 0.30                           | 1.32                           | 0.23                           | 43.94                         |
| #6                    | 1.96     | 4.52                           | 12.31            | 1.49                            | 7.88                           | 3.37                           | 1.12                           | 7.52                           | 1.23                           | 6.89                           | 1.23                           | 2.79                           | 0.28                           | 1.23                           | 0.15                           | 47.99                         |
| #7                    | 2.07     | 4.06                           | 8.53             | 1.06                            | 4.85                           | 1.63                           | 0.60                           | 4.48                           | 0.81                           | 5.13                           | 1.16                           | 3.31                           | 0.42                           | 2.18                           | 0.29                           | 61.50                         |
| #8                    | 2.43     | 3.98                           | 9.27             | 1.07                            | 5.63                           | 2.47                           | 0.88                           | 6.08                           | 1.04                           | 6.51                           | 1.28                           | 3.05                           | 0.32                           | 1.44                           | 0.17                           | 56.82                         |
| #9                    | 1.97     | 4.32                           | 10.96            | 1.42                            | 7.33                           | 2.92                           | 1.01                           | 6.71                           | 1.11                           | 6.34                           | 1.19                           | 2.80                           | 0.29                           | 1.32                           | 0.17                           | 52.11                         |
| powder1               | 2.08     | 4.86                           | 13.33            | 1.83                            | 9.54                           | 3.68                           | 1.13                           | 7.19                           | 1.13                           | 6.18                           | 1.11                           | 2.56                           | 0.27                           | 1.25                           | 0.16                           | 45.78                         |
| powder2               | 1.47     | 4.54                           | 13.59            | 1.76                            | 9.31                           | 3.68                           | 1.15                           | 7.15                           | 1.11                           | 6.09                           | 1.09                           | 2.54                           | 0.26                           | 1.23                           | 0.16                           | 46.31                         |
| Particle average      |          | 4.73                           | 13.17            | 1.72                            | 8.94                           | 3.49                           | 1.09                           | 7.1                            | 1.14                           | 6.21                           | 1.13                           | 2.62                           | 0.27                           | 1.25                           | 0.16                           | 46.97                         |
| Powder average        |          | 4.67                           | 13.49            | 1.79                            | 9.40                           | 3.68                           | 1.15                           | 7.16                           | 1.12                           | 6.13                           | 1.10                           | 2.55                           | 0.26                           | 1.24                           | 0.16                           | 46.10                         |
| Traditional digestion | 96.8     | 4.38                           | 13.38            | 1.64                            | 8.86                           | 3.65                           | 1.11                           | 6.65                           | 1.06                           | 5.69                           | 1.04                           | 2.36                           | 0.25                           | 1.17                           | 0.14                           | 48.62                         |

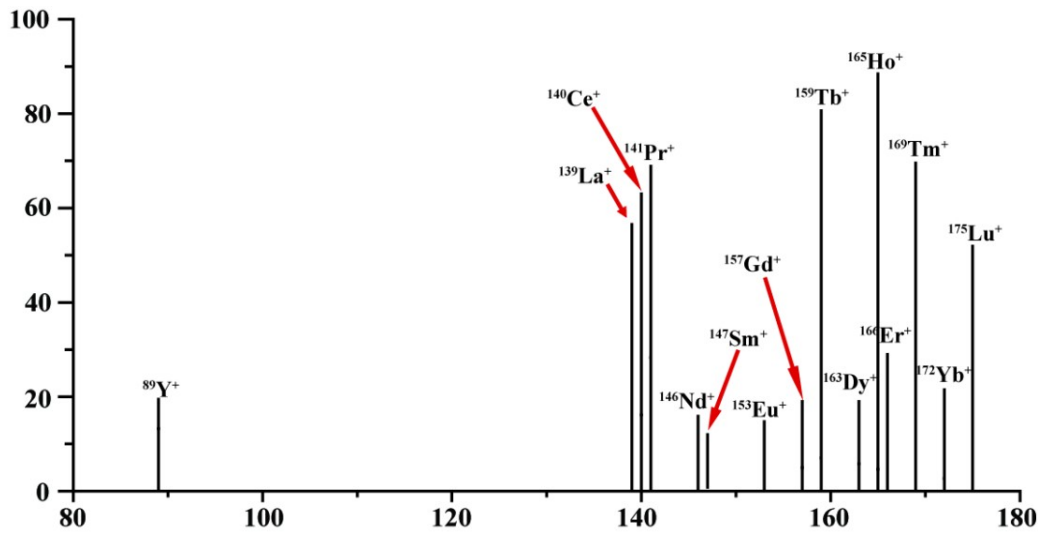

Figure S1 Mass spectra of 15 REEs from one sample

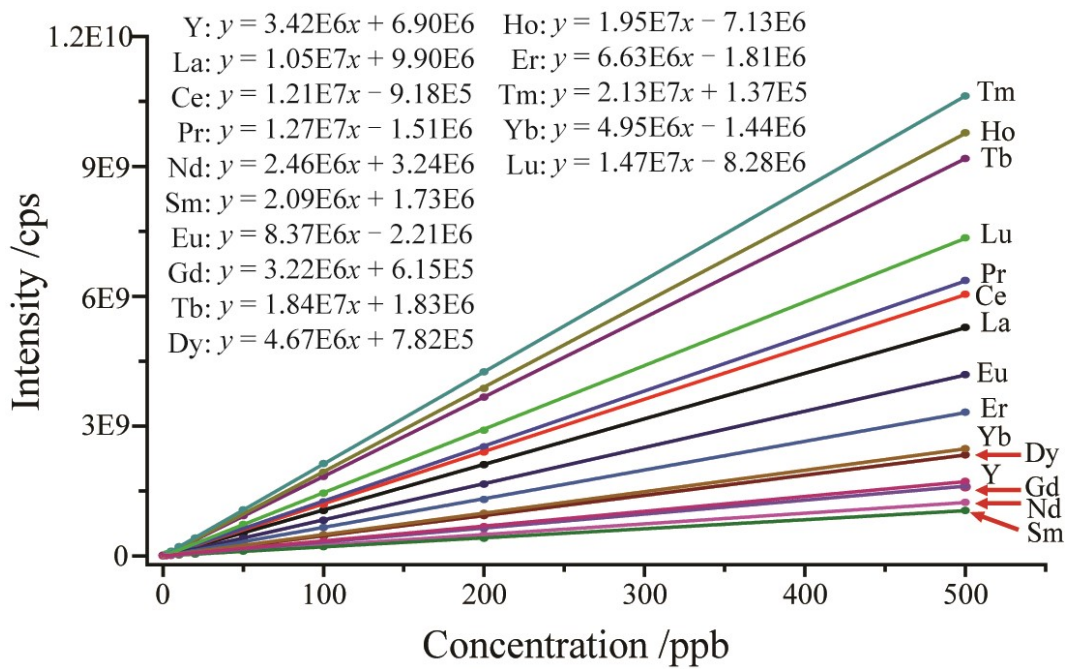

Figure S2 The calibration curves of 15 REEs

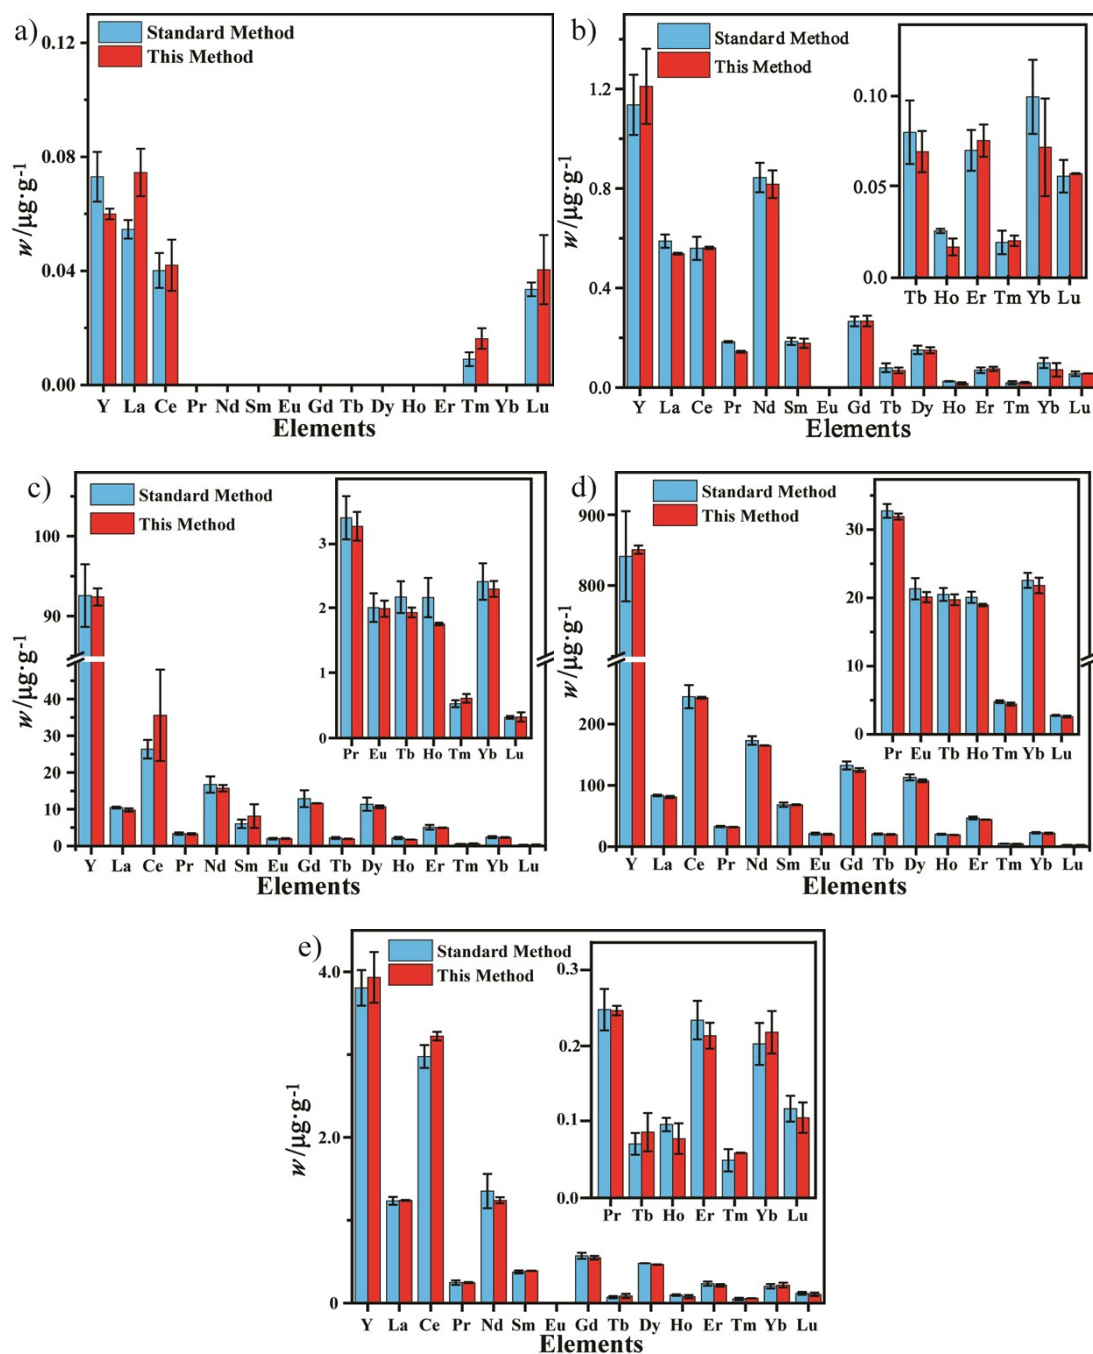

**Figure S3 The fractional amount of 15 REEs and the accuracy of the analytical results obtained by the standard method and this method involved samples**

**a) Water soluble, b) Exchangeable, c) Reducible, d) Oxidable, e) Crystalline**

These solutions: a) 5 mL water; b) 5 mL 0.3 mol/L  $\text{NH}_4\text{Ac}$ ; c) 5 mL 0.1 mol/L  $\text{NH}_2\text{OH}\cdot\text{HCl}$ ; d) 0.1 mol/L  $\text{HNO}_3$  + 1%  $\text{H}_2\text{O}_2$  (mixture); e) 5mL 0.1 mol/L HF and 3 mL 1 mol/L  $\text{HNO}_3$  (respectively) were injected into the sample chamber at the flow rate of 0.3 mL/min by a peristaltic pump to dissolve REEs corresponding to different elementary fractions (Water soluble, Exchangeable, Reducible, Oxidable, Crystalline). Each fraction of the extracts was collected separately and then follow the GB/T 14506 (detailed in manuscript section 2.4) to digest step wisely. Finally transfer digests to volume flask and bring to 10 mL waiting for ICP-MS detection.

By compare the concentration from this standard method and the results obtained from our method the accuracy of the analytical results obtained by the standard method and this method involved samples are shown in figure S3

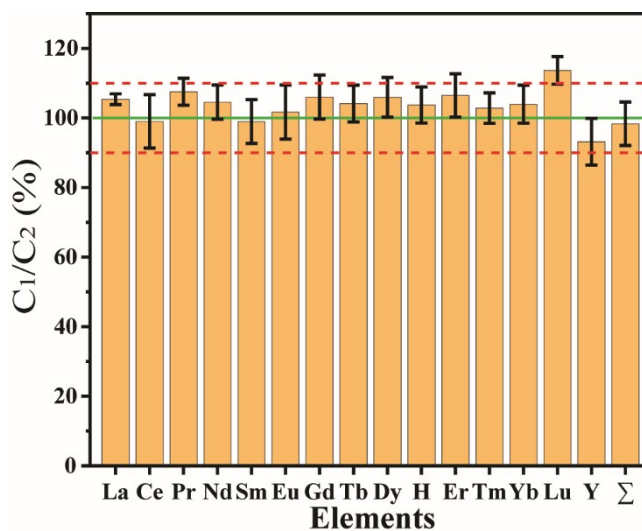

Figure S4 Ratio detected using our method and standard method. C1 means the concentration of sum up all the fraction obtained by our method and C2 means the concentration of sum up all the fraction obtained by the standard method detailed in figure S3
